# Supplementary material
Source: Copernicus journal article supplement (doi:10.5194/acp-26-4823-2026)
Supplement: Supplementary file 1 [file acp-26-4823-2026-supplement.pdf]

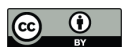

*Supplement of*

## **Mechanistic investigations of the formation of multifunctional products from the multi-generation •OH oxidation of styrene**

**Long Chen et al.**

*Correspondence to:* Yu Huang ([huangyu@ieecas.cn](mailto:huangyu@ieecas.cn))

The copyright of individual parts of the supplement might differ from the article licence.

**Table S1** The energy barriers ( $\Delta E_a$  in kcal/mol) of all the elementary reactions involved in the initial addition of OH radical to styrene and intramolecular H-shift reactions of first generation peroxy radicals S2-1-x calculated at the DLPNO-CCSD(T)/aug-cc-pVTZ and M06-2X/6-311++G(3df,3pd) levels

| Entry                | DLPNO-CCSD(T)/aug-cc-pVTZ | M06-2X/6-311++G(3df,3pd) |
|----------------------|---------------------------|--------------------------|
| R <sub>TS1</sub>     | 0.4                       | 0.8                      |
| R <sub>TS2-1-a</sub> | 21.5                      | 21.0                     |
| R <sub>TS2-1-b</sub> | 32.4                      | 33.3                     |
| R <sub>TS2-1-c</sub> | 32.6                      | 33.6                     |
| R <sub>TS2-1-d</sub> | 27.5                      | 27.9                     |
| R <sub>TS2-1-e</sub> | 30.1                      | 31.3                     |
| R <sub>TS2-1-f</sub> | 31.0                      | 31.1                     |
| R <sub>TS2-1-h</sub> | 30.5                      | 30.6                     |
| R <sub>TS3-1-a</sub> | 1.3                       | 0.8                      |

**Table S2** The relative electronic energy ( $\Delta E_i$ ), free energy ( $\Delta G_i$ ) and Boltzmann population ( $w_i$ ) of different conformers involved in the first generation peroxy radicals S2-1-x predicted at the M06-2X/6-311++G(3df,3pd)//M06-2X/6-31+G(d,p) level

| Conformer | $\Delta E_i$ (kcal/mol) | $\Delta G_i$ (kcal/mol) | $w_i$  |
|-----------|-------------------------|-------------------------|--------|
| S2-1-a    | 0.00                    | 0.00                    | 57.32% |
| S2-1-b    | 0.18                    | 0.36                    | 31.21% |
| S2-1-c    | 1.34                    | 1.08                    | 9.25%  |
| S2-1-d    | 2.58                    | 2.51                    | 0.83%  |
| S2-1-e    | 2.87                    | 2.88                    | 0.44%  |
| S2-1-f    | 2.98                    | 3.18                    | 0.27%  |
| S2-1-g    | 3.58                    | 2.86                    | 0.46%  |
| S2-1-h    | 3.60                    | 3.27                    | 0.23%  |

**Table S3** The energy barriers ( $\Delta E_a$  in kcal/mol) of the addition OH radical to the different sites of 1<sup>st</sup>-ROOH (S4) calculated at the DLPNO-CCSD(T)/aug-cc-pVTZ//M06-2X/6-311+G(d,p) and M06-2X/6-311++G(3df,3pd)//M06-2X/6-31+g(d,p) levels

| 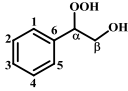<br>(1 <sup>st</sup> -ROOH<br>(S4)) | DLPNO-CCSD(T)/aug-cc-pVTZ//<br>M06-2X/6-311+G(d,p)                         | M06-2X/6-311++G(3df,3pd)//<br>M06-2X/6-31+g(d,p) |
|------------------------------------------------------------------------------------------------------------------------|----------------------------------------------------------------------------|--------------------------------------------------|
|                                                                                                                        | <i>syn</i> -OH-addition ( OH is added in the same direction of -OOH group) |                                                  |
| C1-site                                                                                                                | 3.3                                                                        | 3.6                                              |

|                                                                                 |     |     |
|---------------------------------------------------------------------------------|-----|-----|
| C2-site                                                                         | 7.8 | 8.8 |
| C3-site                                                                         | 8.4 | 9.5 |
| C4-site                                                                         | 5.4 | 5.7 |
| C5-site                                                                         | 5.0 | 6.2 |
| C6-site                                                                         | 4.7 | 5.8 |
| <i>anti</i> -OH-addition ( OH is added in the opposite direction of -OOH group) |     |     |
| C1-site                                                                         | 2.0 | 0.8 |
| C2-site                                                                         | 6.3 | 5.3 |
| C3-site                                                                         | 6.7 | 6.0 |
| C4-site                                                                         | 5.7 | 4.7 |
| C5-site                                                                         | 2.6 | 1.4 |
| C6-site                                                                         | 5.2 | 4.3 |

**Table S4** The relative electronic energy ( $\Delta E_i$ ), free energy ( $\Delta G_i$ ) and Boltzmann population ( $w_i$ ) of different conformers involved in S8-x predicted at the M06-2X/6-311++G(3df,3pd)/M06-2X/6-31+G(d,p) level

| Conformer | $\Delta E_i$ (kcal/mol) | $\Delta G_i$ (kcal/mol) | $w_i$  |
|-----------|-------------------------|-------------------------|--------|
| S8-a      | 0.00                    | 0.00                    | 85.78% |
| S8-b      | 1.27                    | 1.20                    | 11.30% |
| S8-c      | 1.75                    | 2.43                    | 1.42%  |
| S8-d      | 2.44                    | 2.58                    | 1.10%  |
| S8-e      | 2.86                    | 3.18                    | 0.40%  |

**Table S5** The energy barrier ( $\Delta E_a$ ), IRC-TST rate coefficient ( $k_{\text{IRC-TST}}$ ), Boltzmann populations ( $w_i$ ) of conformer  $i$ , and MC-TST rate coefficient ( $k_{\text{MC-TST}}$ ) involved in S8-x calculated at the M06-2X/6-311++G(3df,3pd)/M06-2X/6-31+G(d,p) level

| Reactions                 | $\Delta E_a$ (kcal/mol) | $k_{\text{IRC-TST}}$ ( $\text{s}^{-1}$ ) | $w_i$  | $k_{\text{MC-TST}}$ ( $\text{s}^{-1}$ ) |
|---------------------------|-------------------------|------------------------------------------|--------|-----------------------------------------|
| S8-a $\rightarrow$ S8-a-P | 24.3                    | $4.3 \times 10^{-4}$                     | 85.78% | $8.2 \times 10^9$                       |
| S8-b $\rightarrow$ S8-b-P | 8.4                     | $3.1 \times 10^6$                        | 11.30% |                                         |
| S8-c $\rightarrow$ S8-c-P | 0.6                     | $5.8 \times 10^{11}$                     | 1.42%  |                                         |
| S8-d $\rightarrow$ S8-d-P | 34.2                    | $7.2 \times 10^{-10}$                    | 1.10%  |                                         |
| S8-e $\rightarrow$ S8-e-P | 11.8                    | $5.4 \times 10^4$                        | 0.40%  |                                         |

**Table S6** The relative electronic energy ( $\Delta E_i$ ), free energy ( $\Delta G_i$ ) and Boltzmann population ( $w_i$ ) of different conformers involved in S28-x predicted at the M06-2X/6-311++G(3df,3pd)/M06-2X/6-31+G(d,p) level

| Conformer | $\Delta E_i$ (kcal/mol) | $\Delta G_i$ (kcal/mol) | $w_i$  |
|-----------|-------------------------|-------------------------|--------|
| S28-a     | 0.00                    | 0.00                    | 88.79% |
| S28-b     | 1.50                    | 1.41                    | 8.21%  |
| S28-c     | 1.97                    | 2.11                    | 2.52%  |
| S28-d     | 3.88                    | 3.14                    | 0.44%  |
| S28-e     | 4.49                    | 4.42                    | 0.05%  |

**Table S7** The activation energy ( $\Delta E_a$ ), IRC-TST rate coefficient ( $k_{\text{IRC-TST}}$ ), Boltzmann populations ( $w_i$ ) of conformer  $i$ , and MC-TST rate coefficient ( $k_{\text{MC-TST}}$ ) involved in S28-x calculated at the M06-2X/6-311++G(3df,3pd)/M06-2X/6-31+G(d,p) level

| Reactions                   | $\Delta E_a$ (kcal/mol) | $k_{\text{IRC-TST}}$ ( $\text{s}^{-1}$ ) | $w_i$  | $k_{\text{MC-TST}}$ ( $\text{s}^{-1}$ ) |
|-----------------------------|-------------------------|------------------------------------------|--------|-----------------------------------------|
| S28-a $\rightarrow$ S28-a-P | 12.7                    | $8.9 \times 10^4$                        | 88.79% | $1.7 \times 10^9$                       |
| S28-b $\rightarrow$ S28-b-P | 25.6                    | $6.2 \times 10^4$                        | 8.21%  |                                         |
| S28-c $\rightarrow$ S28-c-P | 38.3                    | $7.3 \times 10^{-12}$                    | 2.52%  |                                         |
| S28-d $\rightarrow$ S28-d-P | 6.0                     | $5.1 \times 10^7$                        | 0.44%  |                                         |
| S28-e $\rightarrow$ S28-e-P | 2.0                     | $3.4 \times 10^{10}$                     | 0.05%  |                                         |

**Table S8** Predicted saturated vapour pressure ( $P^0$ ) and saturated concentrations ( $c^0$ ) of styrene and its multi-generation OH oxidation closed-shell products

|                            | Species                                                                                                                                       | $P^0$ (atm)            | $c^0$ ( $\mu\text{g}/\text{m}^3$ ) | Species                                                                                                                                  | $P^0$ (atm)           | $c^0$ ( $\mu\text{g}/\text{m}^3$ ) |
|----------------------------|-----------------------------------------------------------------------------------------------------------------------------------------------|------------------------|------------------------------------|------------------------------------------------------------------------------------------------------------------------------------------|-----------------------|------------------------------------|
| Initial reactant           | 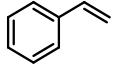<br>Styrene ( $\text{C}_8\text{H}_8$ )<br>VOC              | $4.63 \times 10^{-3}$  | $1.95 \times 10^7$                 |                                                                                                                                          |                       |                                    |
| First generation products  | <br>S4 ( $\text{C}_8\text{H}_{10}\text{O}_3$ )<br>IVOC     | $1.43 \times 10^{-7}$  | $8.89 \times 10^2$                 | <br>S5 ( $\text{C}_8\text{H}_9\text{NO}_3$ )<br>IVOC | $2.54 \times 10^{-7}$ | $1.87 \times 10^3$                 |
|                            | <br>Benzaldehyde ( $\text{C}_7\text{H}_6\text{O}$ )<br>VOC | $7.62 \times 10^{-4}$  | $2.89 \times 10^6$                 |                                                                                                                                          |                       |                                    |
| Second generation products | <br>S6 ( $\text{C}_8\text{H}_{12}\text{O}_8$ )<br>LVOC     | $4.72 \times 10^{-12}$ | $4.50 \times 10^{-2}$              | <br>S10 ( $\text{C}_4\text{H}_4\text{O}_2$ )<br>VOC  | $6.41 \times 10^{-4}$ | $2.17 \times 10^6$                 |

|                           |                                                                                     |                        |                       |                                                                                      |                        |                       |
|---------------------------|-------------------------------------------------------------------------------------|------------------------|-----------------------|--------------------------------------------------------------------------------------|------------------------|-----------------------|
|                           | 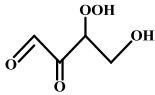   | $1.83 \times 10^{-7}$  | $9.91 \times 10^2$    |    | $5.11 \times 10^{-9}$  | $2.97 \times 10^{-2}$ |
|                           | S10-2 (C <sub>4</sub> H <sub>6</sub> O <sub>5</sub> )<br>IVOC                       |                        |                       | S13 (C <sub>8</sub> H <sub>10</sub> O <sub>8</sub> )<br>LVOC                         |                        |                       |
|                           |    | $2.48 \times 10^{-3}$  | $8.39 \times 10^6$    |    | $5.11 \times 10^{-9}$  | 42.21                 |
|                           | S14 (C <sub>4</sub> H <sub>4</sub> O <sub>2</sub> )<br>VOC                          |                        |                       | S20 (C <sub>6</sub> H <sub>8</sub> O <sub>6</sub> )<br>SVOC                          |                        |                       |
|                           |    | $6.73 \times 10^{-8}$  | $4.31 \times 10^2$    |                                                                                      |                        |                       |
|                           | S23 (C <sub>6</sub> H <sub>6</sub> O <sub>5</sub> )<br>IVOC                         |                        |                       |                                                                                      |                        |                       |
|                           |    | $1.52 \times 10^{-11}$ | 0.18                  |    | $3.29 \times 10^{-7}$  | $2.16 \times 10^3$    |
|                           | S26 (C <sub>8</sub> H <sub>10</sub> N <sub>2</sub> O <sub>10</sub> )<br>LVOC        |                        |                       | S30-2 (C <sub>4</sub> H <sub>5</sub> NO <sub>6</sub> )<br>IVOC                       |                        |                       |
|                           |  | $5.11 \times 10^{-9}$  | $2.97 \times 10^{-2}$ |  | $9.16 \times 10^{-9}$  | 75.86                 |
|                           | S33 (C <sub>8</sub> H <sub>10</sub> O <sub>8</sub> )<br>LVOC                        |                        |                       | S40-1 (C <sub>6</sub> H <sub>7</sub> NO <sub>7</sub> )<br>SVOC                       |                        |                       |
|                           |  | $6.73 \times 10^{-8}$  | $4.31 \times 10^2$    |                                                                                      |                        |                       |
|                           | S40-2 (C <sub>6</sub> H <sub>6</sub> O <sub>5</sub> )<br>IVOC                       |                        |                       |                                                                                      |                        |                       |
| Third generation products |  | $2.64 \times 10^{-14}$ | $2.68 \times 10^{-4}$ |  | $4.63 \times 10^{-10}$ | 3.59                  |
|                           | S47 (C <sub>8</sub> H <sub>12</sub> O <sub>9</sub> )<br>LVOC                        |                        |                       | S48 (C <sub>6</sub> H <sub>8</sub> O <sub>7</sub> )<br>SVOC                          |                        |                       |
|                           |  | $1.46 \times 10^{-14}$ | $1.58 \times 10^{-4}$ |  | $4.73 \times 10^{-14}$ | $5.37 \times 10^{-4}$ |
|                           | S51 (C <sub>8</sub> H <sub>12</sub> O <sub>10</sub> )<br>LVOC                       |                        |                       | S58 (C <sub>8</sub> H <sub>11</sub> NO <sub>10</sub> )<br>LVOC                       |                        |                       |

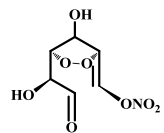

S59 (C<sub>6</sub>H<sub>7</sub>NO<sub>8</sub>)  
SVOC

$1.14 \times 10^{-9}$

10.16

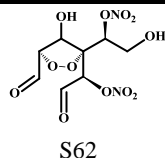

S62  
(C<sub>8</sub>H<sub>10</sub>N<sub>2</sub>O<sub>12</sub>)  
LVOC

$4.70 \times 10^{-14}$

$6.18 \times 10^{-4}$

---

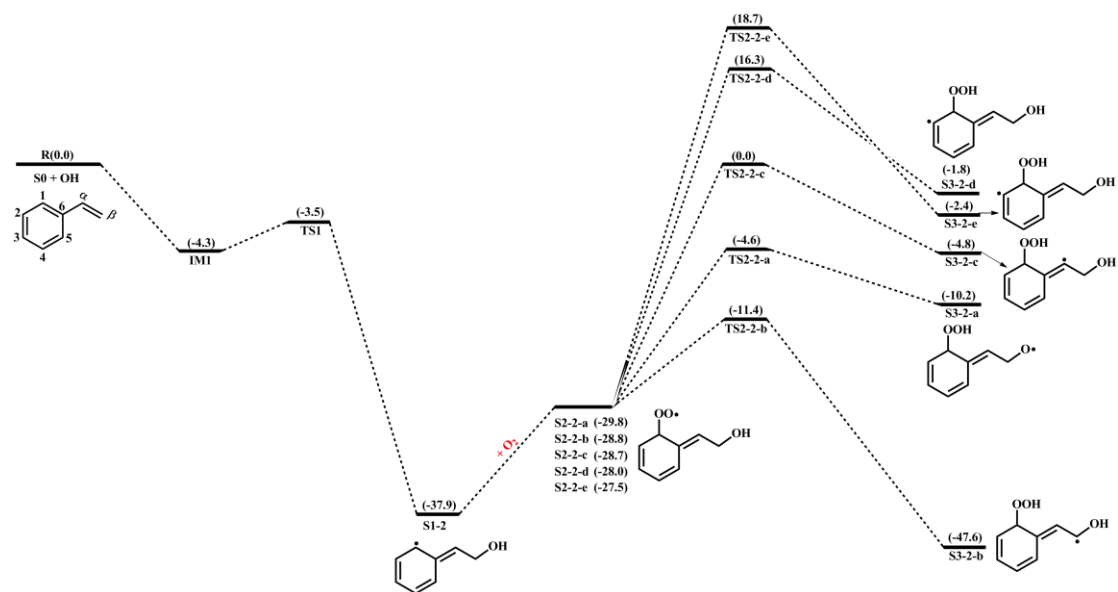

**Figure S1.** PES for the OH-initiated oxidation of styrene and the unimolecular reactions of S2-2-x at the M06-2X/6-311++G(3df,3pd)//M06-2X/6-31+g(d,p) level

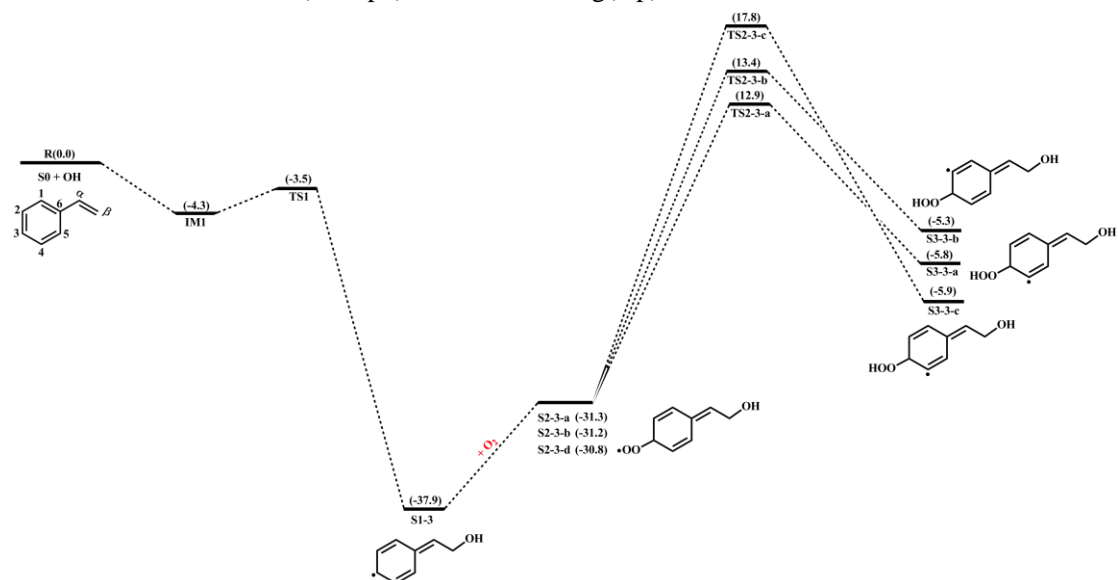

**Figure S2.** PES for the OH-initiated oxidation of styrene and the unimolecular reactions of S2-3-x at the M06-2X/6-311++G(3df,3pd)//M06-2X/6-31+g(d,p) level

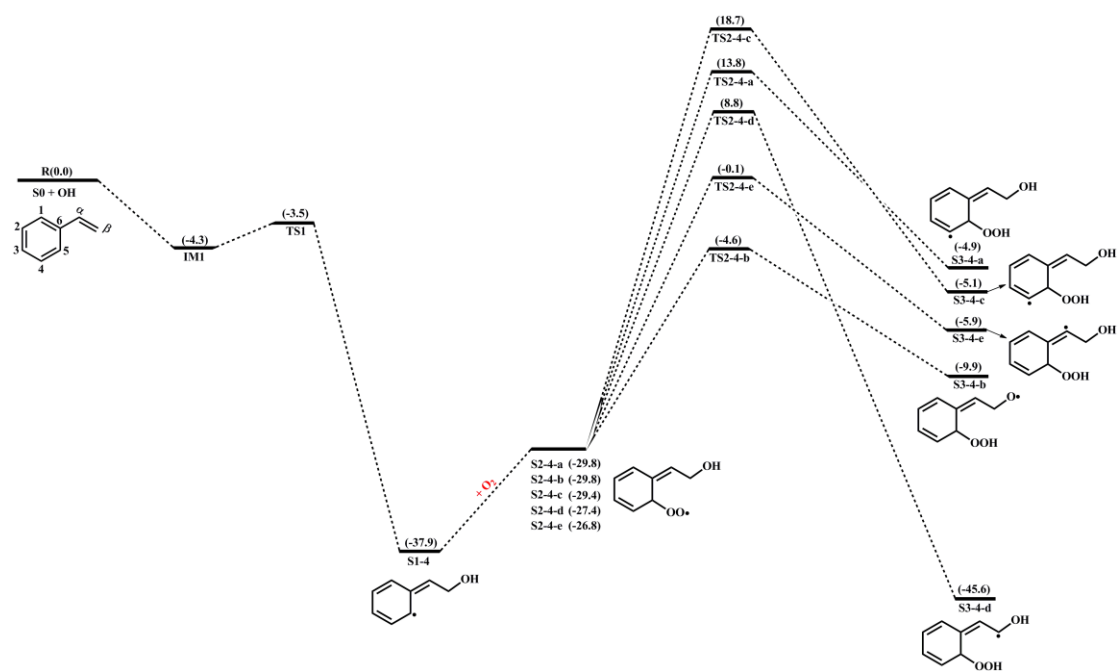

**Figure S3.** PES for the OH-initiated oxidation of styrene and the unimolecular reactions of S2-4-x at the M06-2X/6-311++G(3df,3pd)//M06-2X/6-31+g(d,p) level

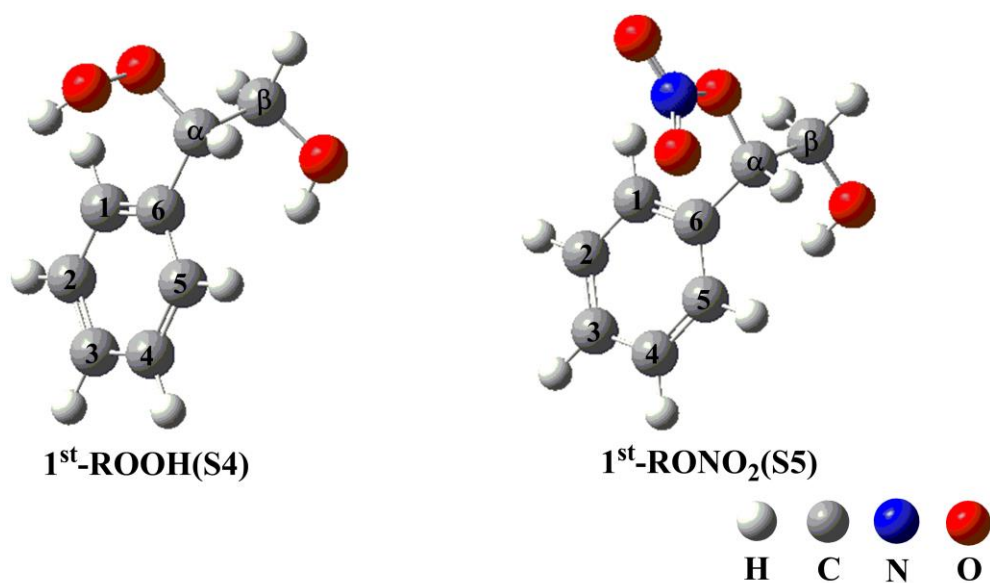

**Figure S4.** Global minimum structures of 1<sup>st</sup>-ROOH(S4) and 1<sup>st</sup>-RONO<sub>2</sub>(S5) at the M06-2X/6-31+g(d,p) level

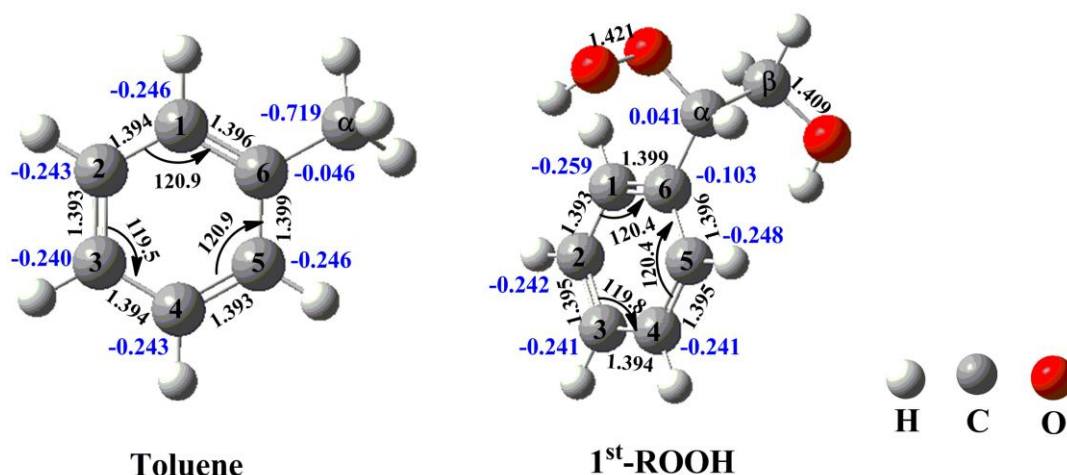

**Figure S5.** The geometric parameters of toluene and 1<sup>st</sup>-ROOH (S4) and the NPA atomic charges (blue font) of all the carbon atoms in the benzene ring predicted at the M06-2X/6-31+g(d,p) level

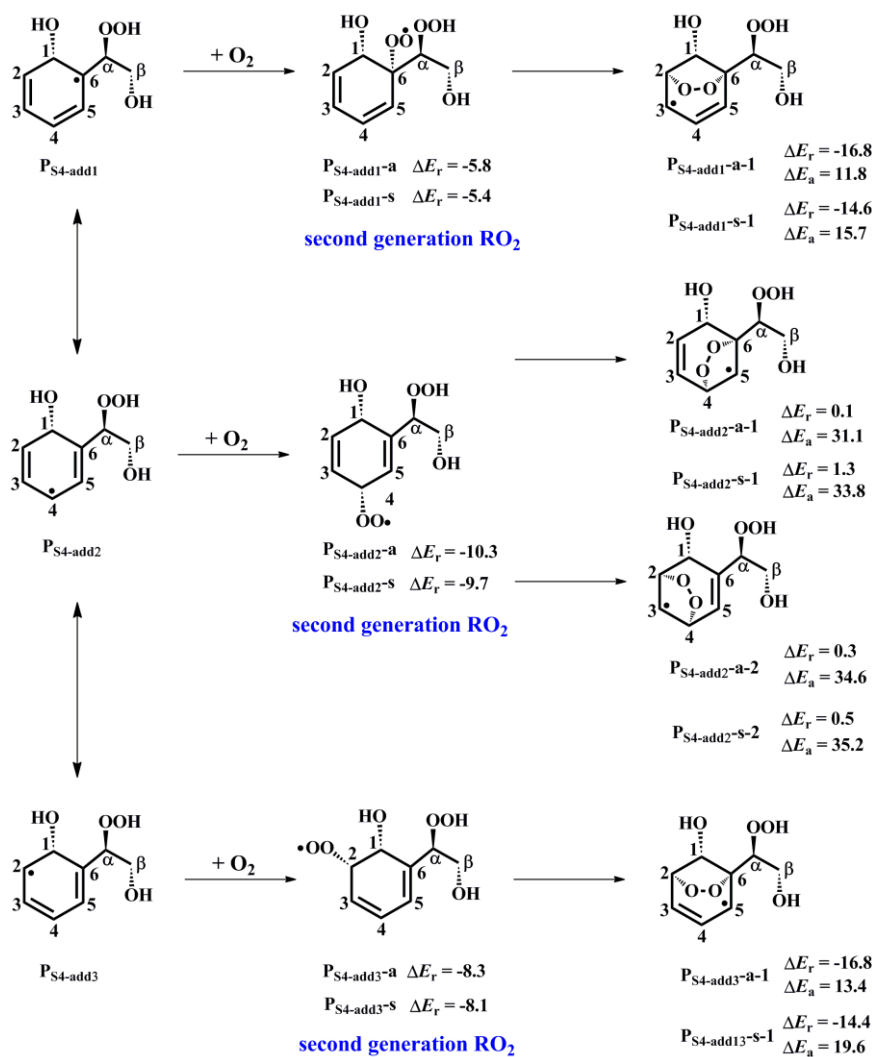

**Figure S6.** PES for the addition reactions P<sub>S4-add1</sub> + O<sub>2</sub> and subsequent intramolecular cyclization reactions at the M06-2X/6-311++G(3df,3pd)/M06-2X/6-31+g(d,p) level (the symbols s and a represent *syn*- and *anti*-O<sub>2</sub>-addition)

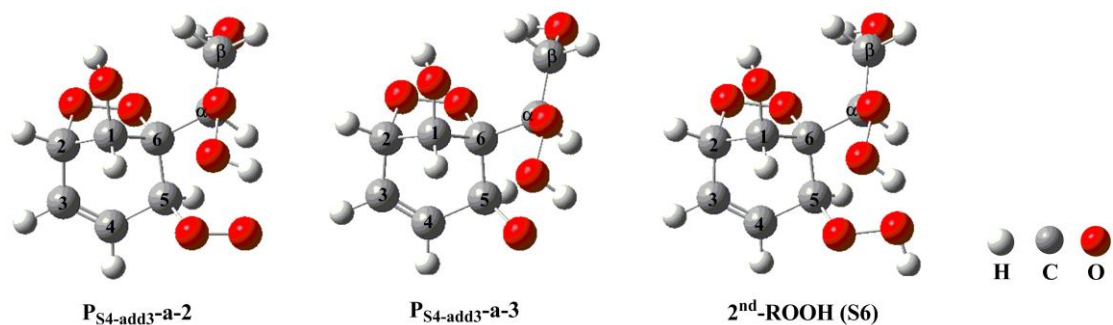

**Figure S7.** The lowest energy conformers of third generation peroxy radical  $P_{S4-add3-a-2}$ , peroxide bicyclic alkoxy radical  $P_{S4-add3-a-3}$  and the second generation product bicyclic hydroperoxide  $2^{nd}$ -ROOH(S6) at the M06-2X/6-31+g(d,p) level

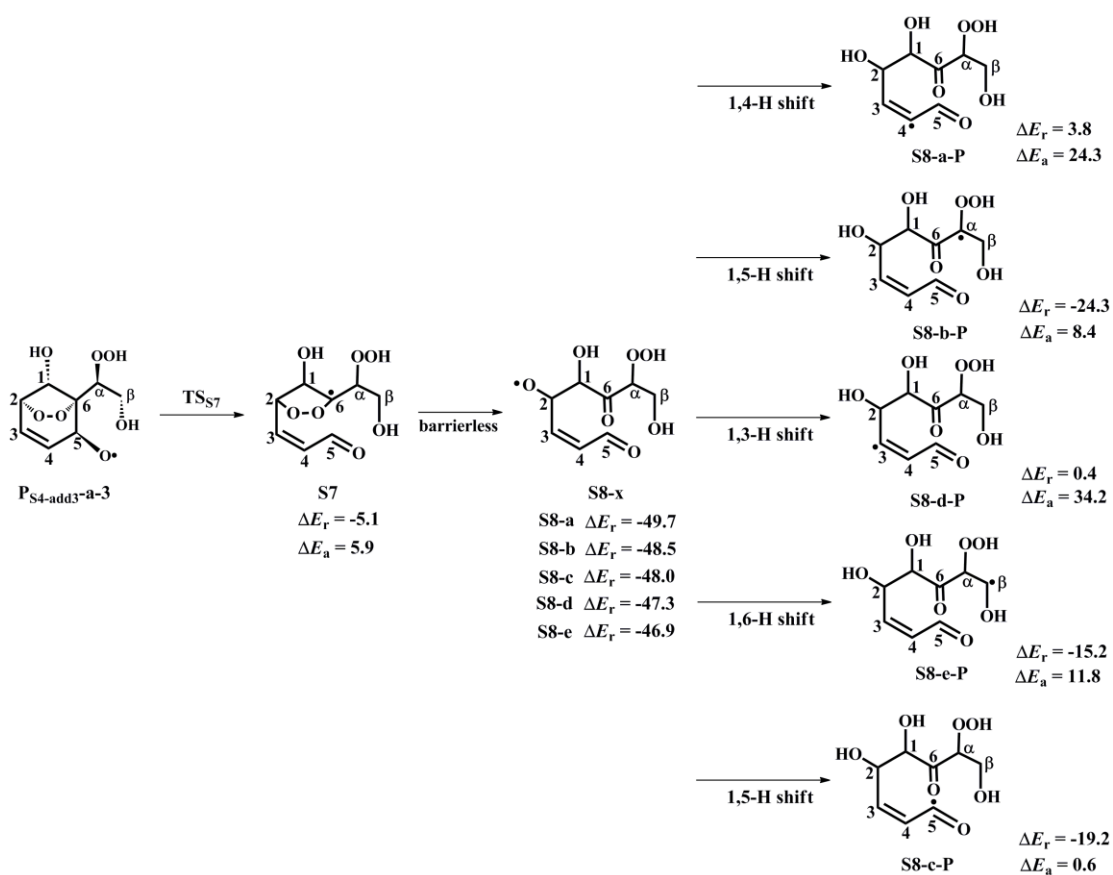

**Figure S8.** PES for the intramolecular hydrogen transfer reactions of S8-x at the M06-2X/6-311++G(3df,3pd)/M06-2X/6-31+g(d,p) level

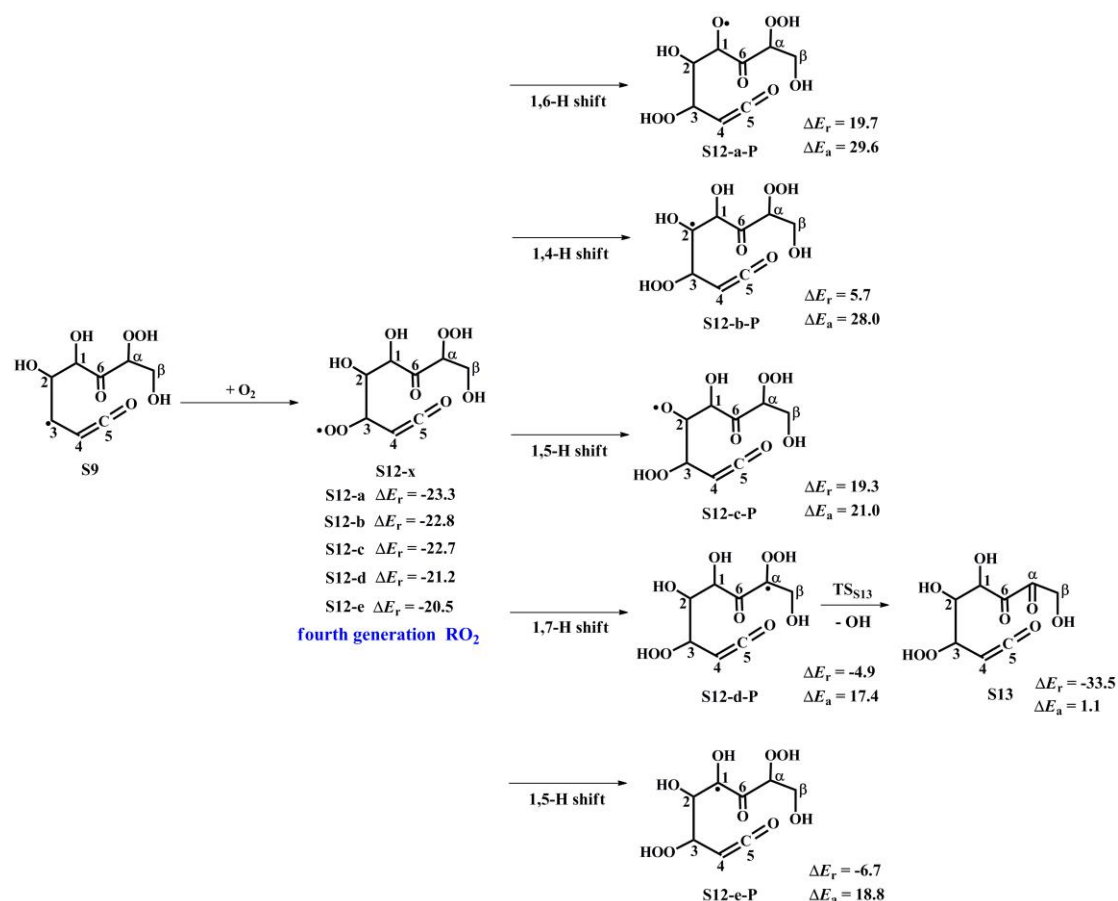

**Figure S9.** PES for the intramolecular hydrogen transfer reactions of S12-x at the M06-2X/6-311++G(3df,3pd)//M06-2X/6-31+g(d,p) level

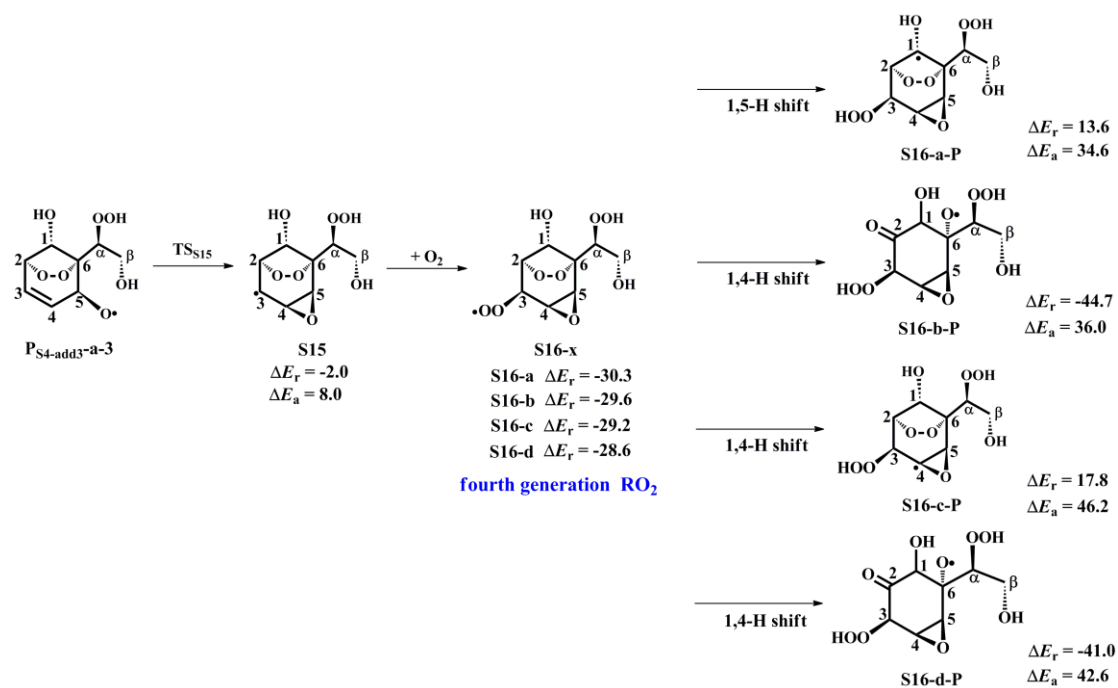

**Figure S10.** PES for the intramolecular hydrogen transfer reactions of S16-x at the M06-2X/6-311++G(3df,3pd)//M06-2X/6-31+g(d,p) level

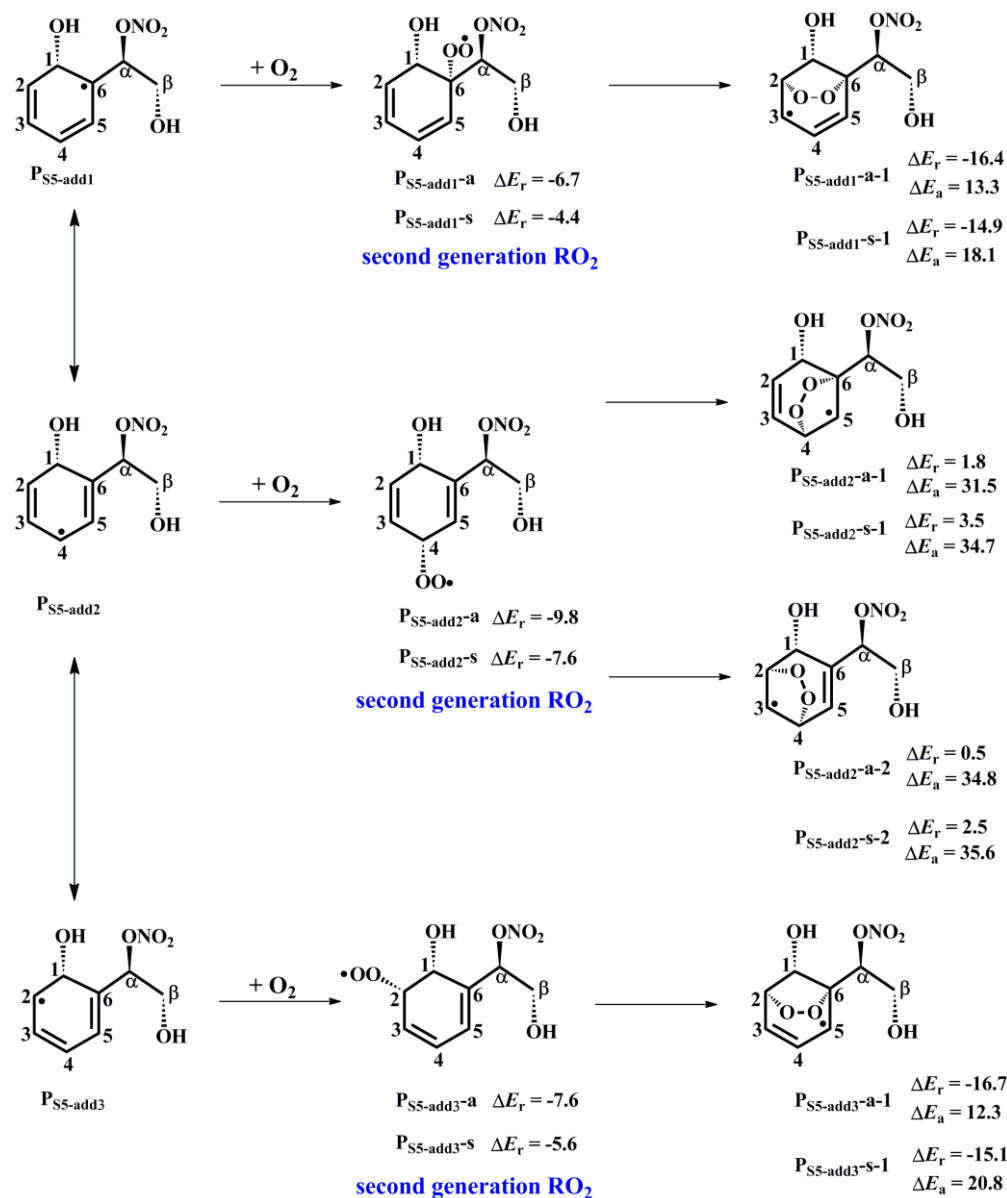

**Figure S11.** PES for the addition reactions  $P_{S5-add1} + O_2$  and subsequent intramolecular cyclization reactions at the M06-2X/6-311++G(3df,3pd)//M06-2X/6-31+g(d,p) level (the symbols s and a represent *syn*- and *anti*-O<sub>2</sub>-addition)

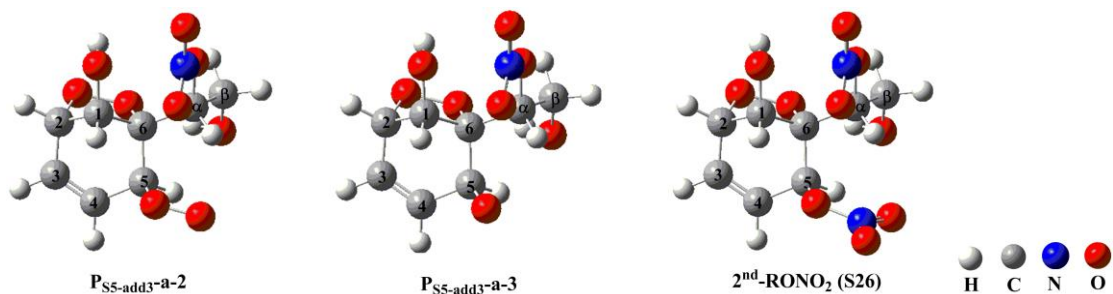

**Figure S12.** The lowest energy conformers of third generation peroxy radical  $P_{S5-add3-a-2}$ , peroxide bicyclic alkoxy radical  $P_{S5-add3-a-3}$  and the second generation product bicyclic organic nitrate  $2^{nd}\text{-RONO}_2(S26)$  at the M06-2X/6-31+g(d,p) level

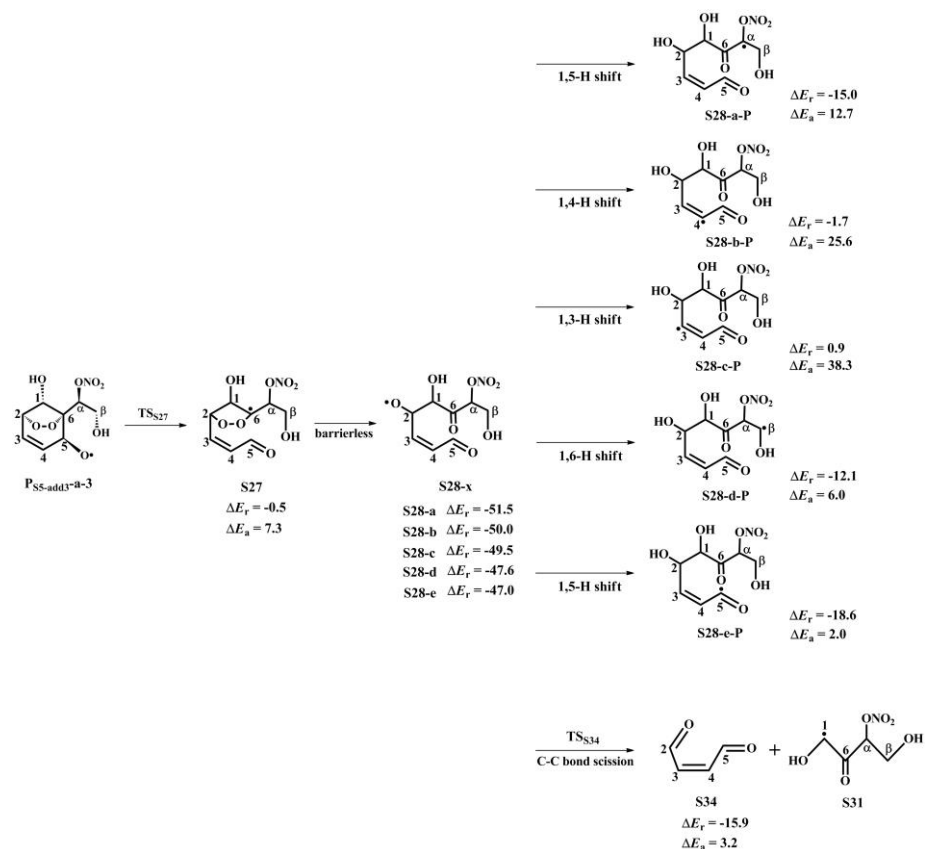

**Figure S13.** PES for the intramolecular hydrogen transfer reactions of S28-x at the M06-2X/6-311++G(3df,3pd)/M06-2X/6-31+g(d,p) level

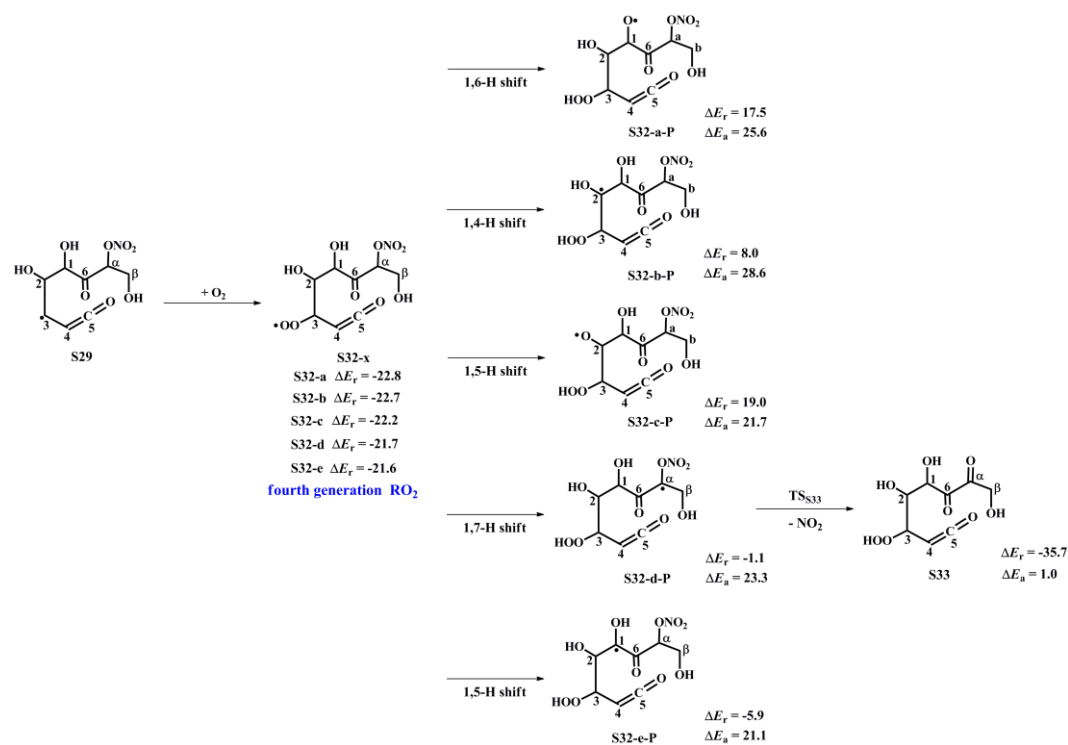

**Figure S14.** PES for the intramolecular hydrogen transfer reactions of S32-x at the M06-2X/6-311++G(3df,3pd)/M06-2X/6-31+g(d,p) level

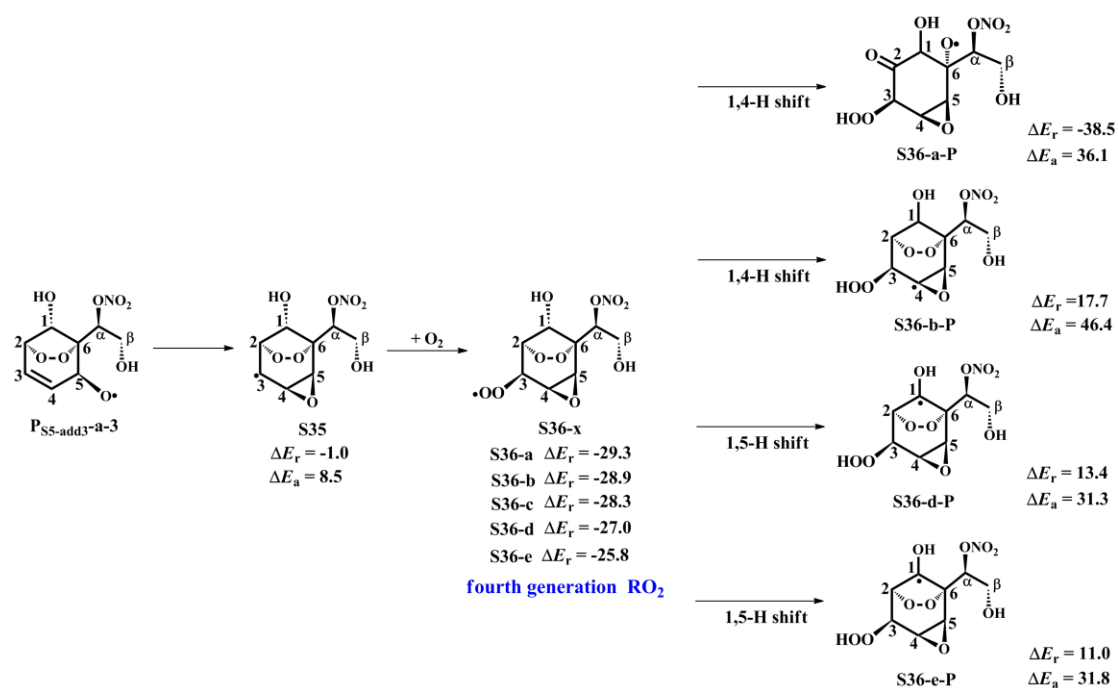

**Figure S15.** PES for the intramolecular hydrogen transfer reactions of S36-x at the M06-2X/6-311++G(3df,3pd)//M06-2X/6-31+g(d,p) level

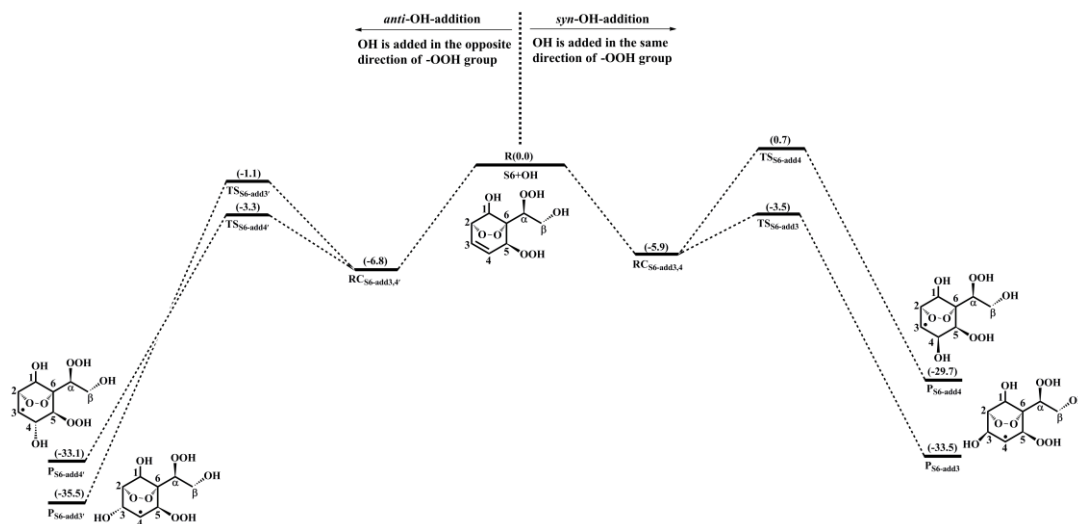

**Figure S16.** PES for the OH-addition reactions involved in the OH-initiated oxidation of 2<sup>nd</sup>-ROOH (S6) at the M06-2X/6-311++G(3df,3pd)//M06-2X/6-31+g(d,p) level

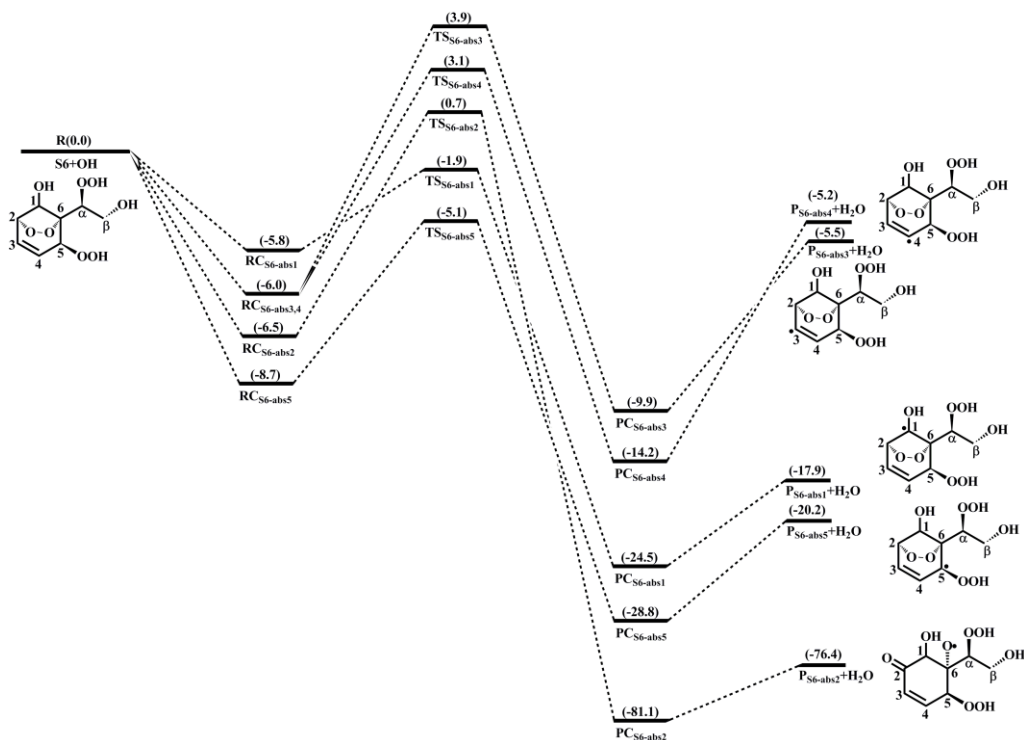

**Figure S17.** PES for the H-abstraction reactions involved in the OH-initiated oxidation of 2<sup>nd</sup>-ROOH (S6) at the M06-2X/6-311++G(3df,3pd)//M06-2X/6-31+g(d,p) level

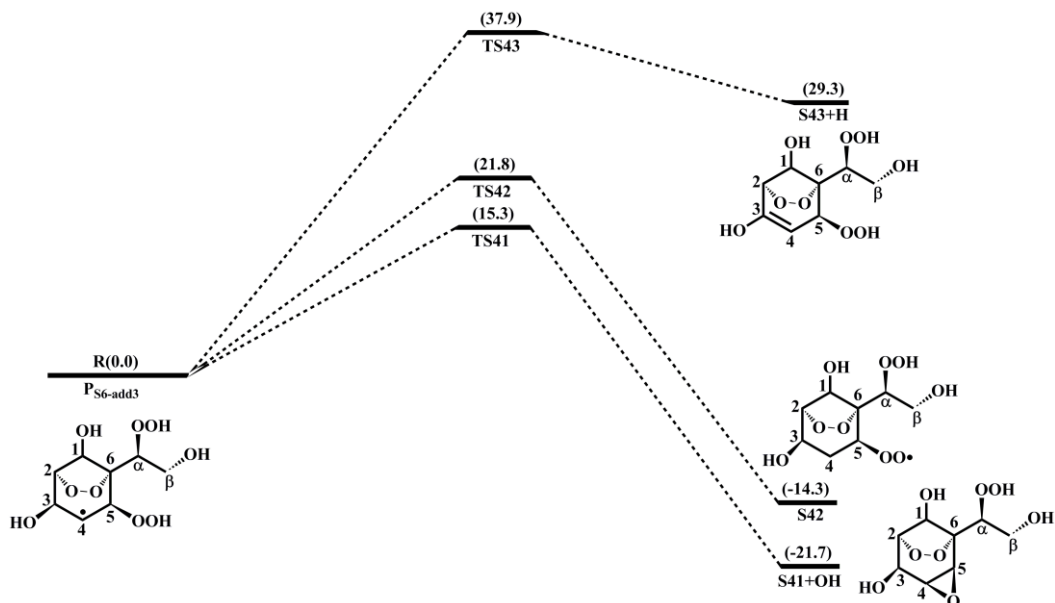

**Figure S18.** PES for the unimolecular decomposition of P<sub>S6-add3</sub> at the M06-2X/6-311++G(3df,3pd)//M06-2X/6-31+g(d,p) level

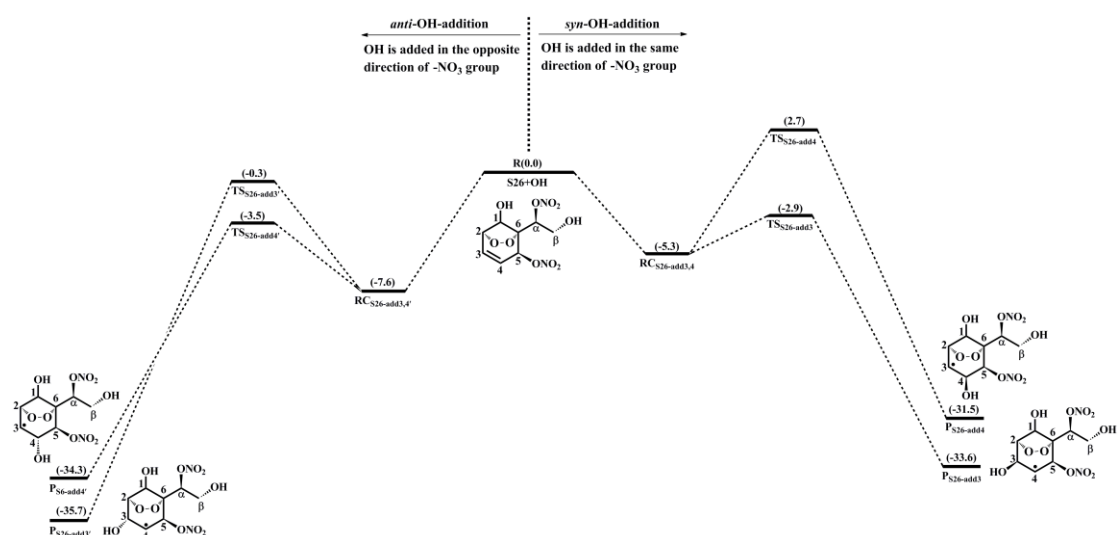

**Figure S19.** PES for the OH-addition reactions involved in the OH-initiated oxidation of 2<sup>nd</sup>-RONO<sub>2</sub> (S26) at the M06-2X/6-311++G(3df,3pd)//M06-2X/6-31+g(d,p) level

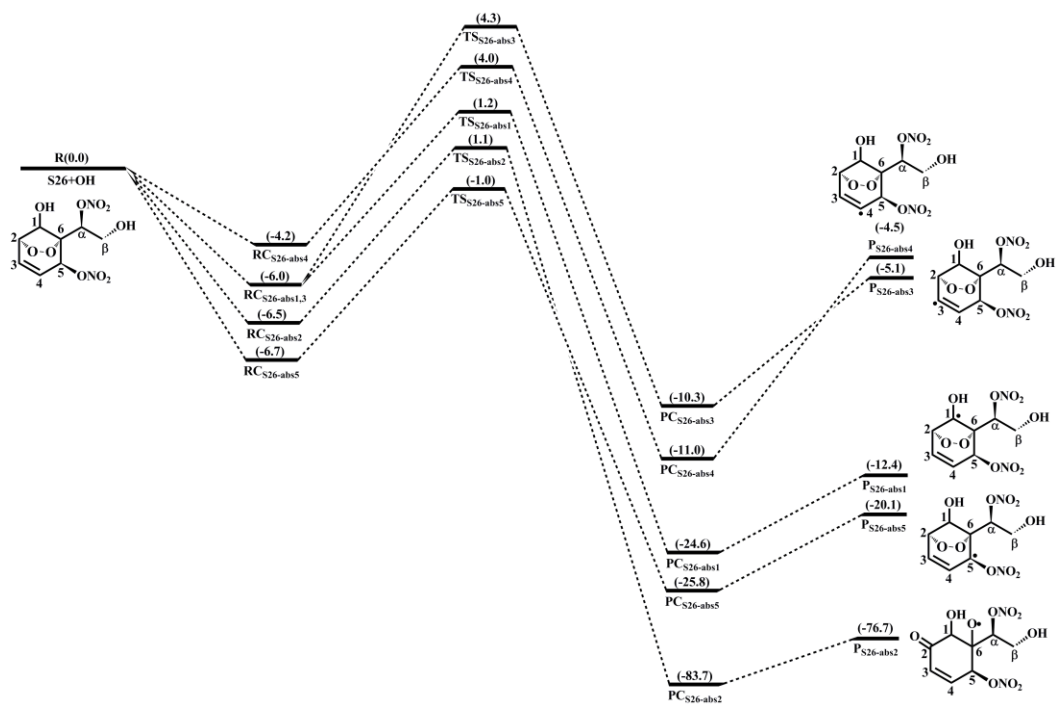

**Figure S20.** PES for the H-abstraction reactions involved in the OH-initiated oxidation of 2<sup>nd</sup>-RONO<sub>2</sub> (S26) at the M06-2X/6-311++G(3df,3pd)//M06-2X/6-31+g(d,p) level

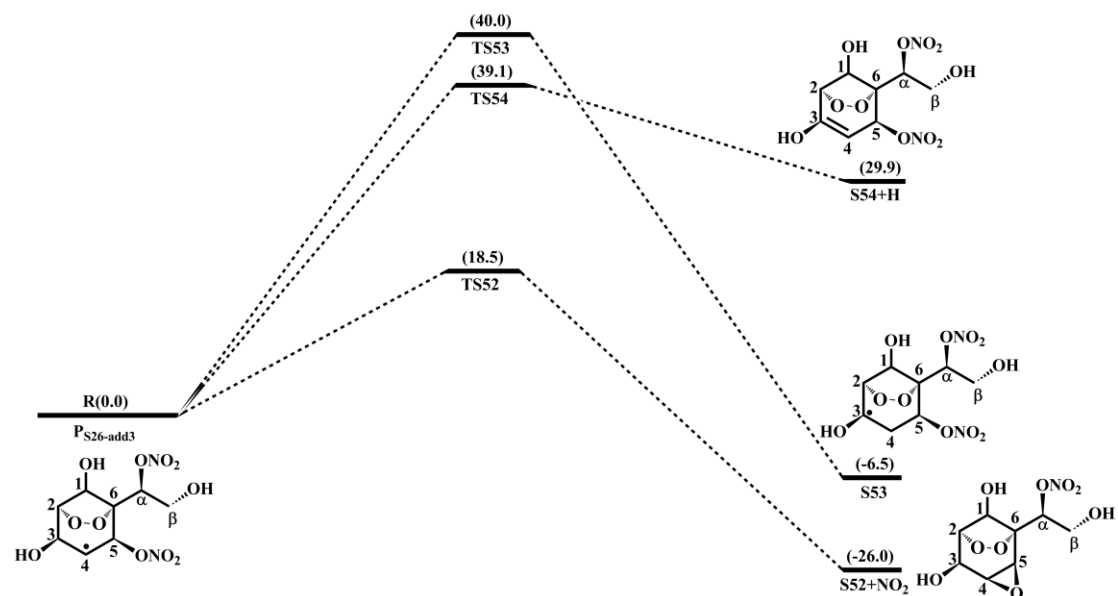

**Figure S21.** PES for the unimolecular decomposition of P<sub>S26-add3</sub> at the M06-2X/6-311++G(3df,3pd)//M06-2X/6-31+g(d,p) level

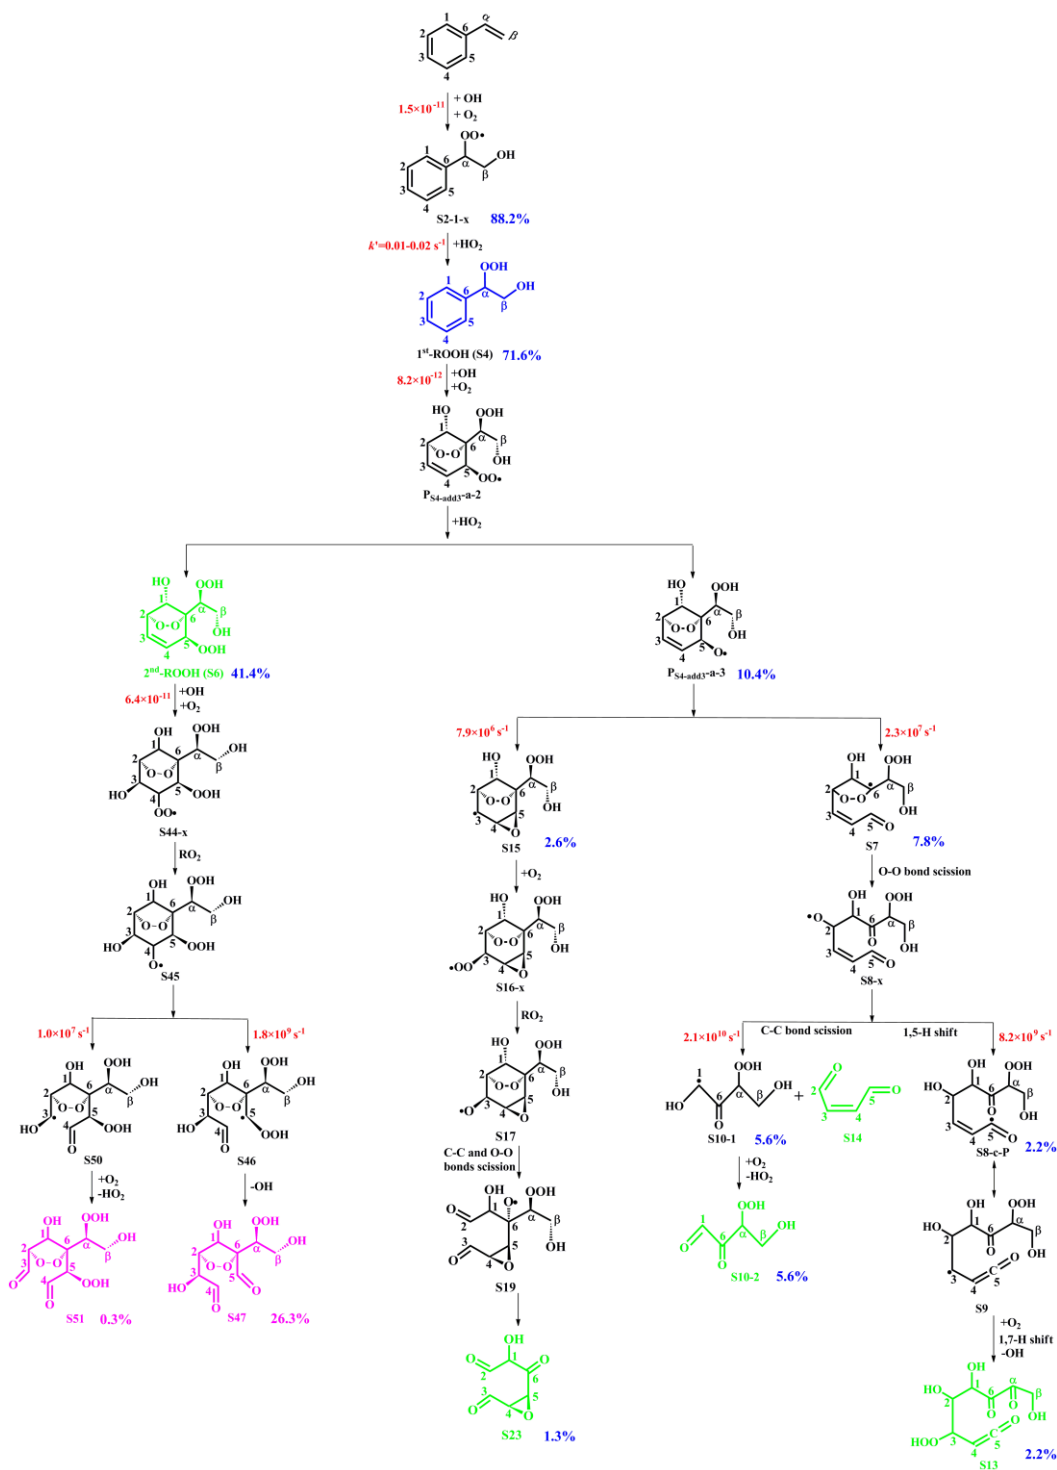

**Figure S22.** Overall reaction mechanism of the multi-generation OH oxidation of styrene in the low-NO<sub>x</sub> conditions. The blue, green, and pink molecular structures represent the first, second and third generation closed-shell products, respectively. The rate coefficients are displayed in red. The calculated fractional yields of the closed-shell products are represented in blue. The reaction of peroxy radical with HO<sub>2</sub> radicals is assumed to yield ROOH with a 80% branching ratio and RO radicals with a 20% branching ratio, based on the reaction of OH-substituted peroxy species with HO<sub>2</sub> radicals.

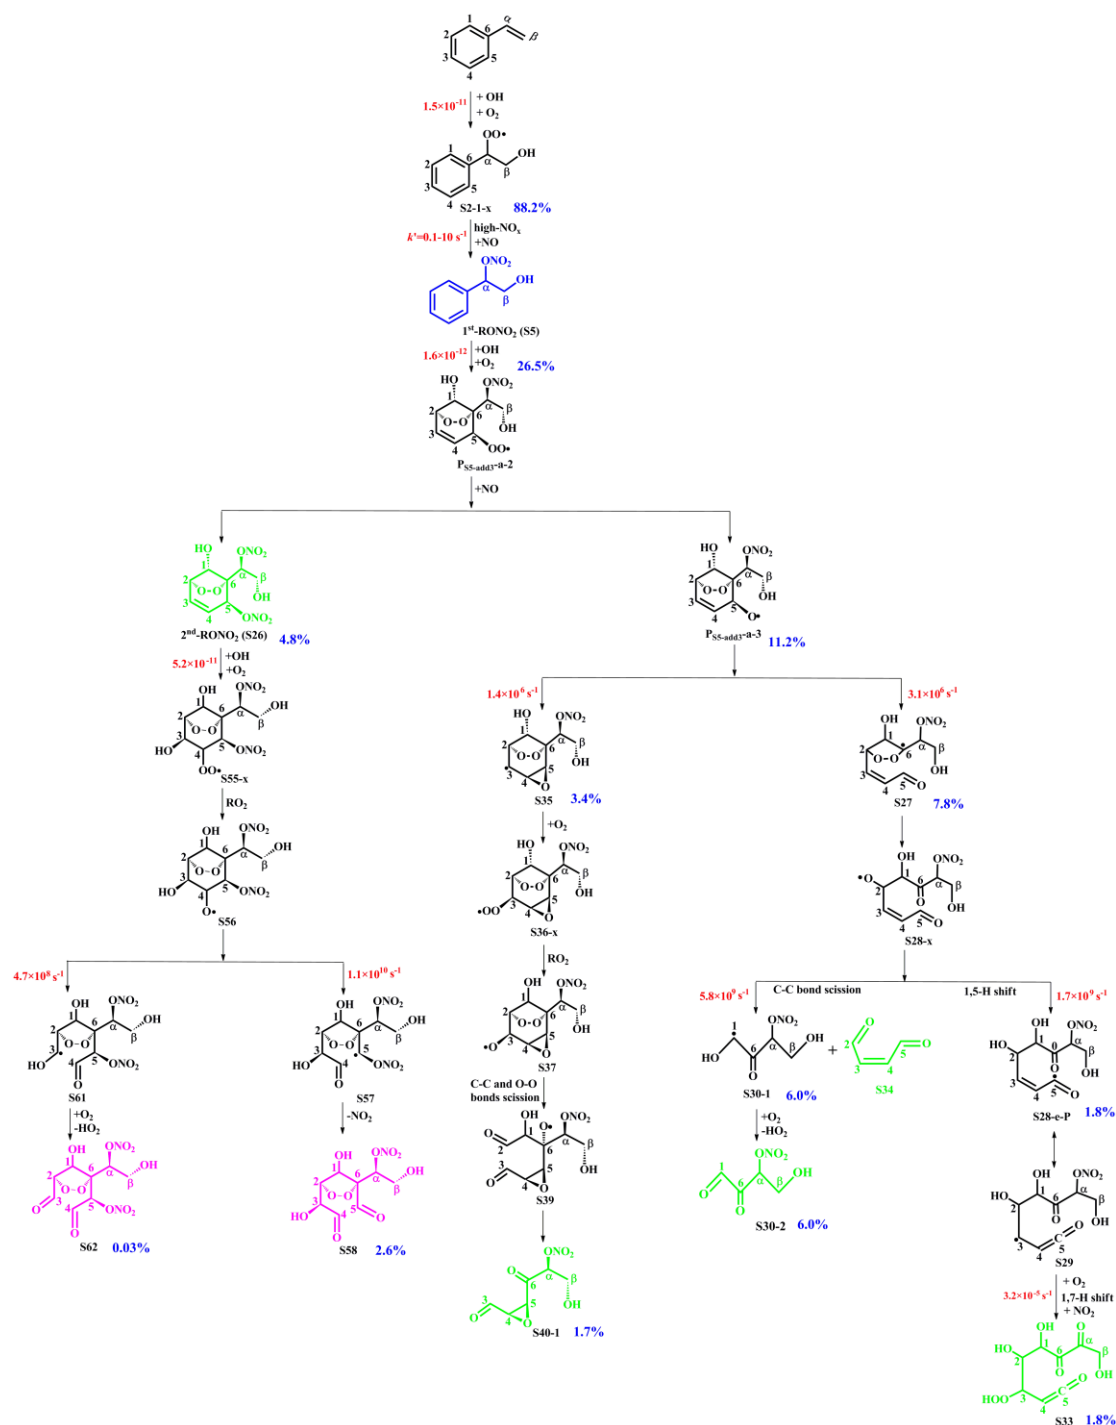

**Figure S23.** Overall reaction mechanism of the multi-generation OH oxidation of styrene in the high-NO<sub>x</sub> conditions. The blue, green, and pink molecular structures represent the first, second and third generation closed-shell products, respectively. The rate coefficients are displayed in red. The calculated fractional yields of the closed-shell products are represented in blue. The reaction of peroxy radical with NO is assumed to yield RONO<sub>2</sub> with a 30% branching ratio and RO radicals with a 70% branching ratio, based on the reaction of peroxy species containing 10 carbon atoms with NO.
